# Supplementary material
Source: publisher figshare collection journal article supplement (https://tandf.figshare.com/ndownloader/files/22391826)
Supplement: Supplementary file 1 [file 22391826]

**Supplementary material**

**Table S1.** Sampling information, taxonomic identities assigned by collectors, study codes, localities, collectors, codes for herbarium specimen, number of samples for morphometric analyses *in situ* (M*in*), *ex situ* in the Botanical Garden of the University of Strasbourg (M*ex*), number of samples analysed for nrDNA ITS ribotypes (ITS), AFLP and nDNA microsatellites (SSR).

| **Subspecies *a priori*** | **Code** | **Locality** | **Collectors** | **Herbarium**  **specimen** | **M*in*** | **M*ex*** | **ITS** | **AFLP** | **SSR** |
| --- | --- | --- | --- | --- | --- | --- | --- | --- | --- |
| *-* | 1763 | Gouaix, Bassin Parisien, France, 48.49°N, 3.29°E | CBN Bassin Parisien | STR | - | 4 | - | - | - |
| *-* | 2005-063 | Espalion, Midi-Pyrénées, France, 44.52°N, 2.76°E | CBN Pyrénées | 2005063 | - | - | - | 1 | - |
| *-* | 2014-018 | Ganties, Midi-Pyrénées, France, 43.0709°N, 0.8185°E*, 380 m | CBN Pyrénées | 2014018 | 1 | 2 | - | 1 | 1 |
| *-* | 96-9044 | L'Aulnaie, Coizard-Joches, Champagne, France, 48.84°N, 3.87°E | CB Lorraine | STR | 1 | 6 | - | - | - |
| *-* | 18A | Forest roadside, Petit Ballon, Alsace, France, 48.006138°N, 7.149048°E*, 572 m | Hardion | STR75084 | 2 | - | 1a | 3 | 1 |
| *-* | 31A | Petite Camargue Alacienne, Alsace, France, 47.63°N, 7.54°E | CB Mulhouse | - | - | - | 1 a | 3 | 1 |
| *-* | BRNU01 | Katuň, Altai Krai, Russia, 51.91°N, 85.84°E, 340 m | D. Kolejková | BRNU578205 | 1 | - | 1 b | 1 | - |
| *-* | BRNU02 | Novokuznetsk, Kondoma, Kemerovo Oblast, Russia, 53.28888°N, 87.252153°E*, 469 m | J. Danihelka, M. Hájek | BRNU624237 | - | - | - | 1 | - |
| *-* | BRNU03 | Khakassia, Shushenskoe, Krasnoyarsk Krai, Russia, 53.3175°N, 91.9539°E*, 270 m | P. Šmarda | BRNU568945 | 1 | - | 1 b | 1 | 1 |
| *-* | BRNU04 | Kosh-Agach, Chagan-Uzun, Altai Republic, Russia, 50.14506°N, 88.33825°E*, 2123 m | P. Lustyk | BRNU581838 | 1 | - | 1 b | 1 | 1 |
| *-* | BRNU05 | Kosh-Agach, Chagan-Uzun, Altai Republic, Russia, 50.14458°N, 88.34567°E*, 2373 m | P. Lustyk | BRNU582514 | 1 | - | - | 1 | - |
| *-* | BRNU06 | Ongudai, Topuchaya, Seminskii Ridge, Altai, Russia, 51.0465°N, 85.618467°E*, 1761 m | Danihelka et al. 2011/0682 | BRNU623406 | - | - | - | 1 | - |
| *-* | BRNU10 | Znojmo, Moravský Krumlov, Czech, 49.048333°N, 16.3486°E*, 320 m | J. Roleček | BRNU597960 | 1 | - | 1 a | 1 | 1 |
| *-* | BRNU15 | Kecskemét, Dabas, Bács-Kiskun, Hungary, 47.18°N, 19.30°E, 100 m | A. Vydrová VG84/020 | BRNU594995 | 1 | - | - | 1 | - |
| *-* | CBNAuv | Auvergne, France, 45.3°N, 3°E, 1000 m | CBN Auvergne | STR | 3 | - | 1 a | 3 | 1 |
| *-* | E05 | Changbaishan, Jilin, China, 42.1°N, 127.8°E, 1500 m | P.P. Wan, K.S. Chow 81142 | E00181912 | - | - | - | - | - |
| *-* | E08 | Ningmute, Henan Mongol, Huangnan, Qinghai, China, 34.4944°N, 101.1692°E, 3410 m | Sino-British Qinghai exp. 1997/778 | E00141311 | 1 | - | - | 1 | - |
| *-* | E17 | W flank Balan Shan, Sichuan, China, 30.8°N, 102.9°E, 3275 m | Chengdu Edinburgh exp. 1991/58 | E00181914 | 1 | - | 1c | 1 | - |
| *-* | E19 | Vicinity of Xiaoshennongjia, Shennongjia Dis, China, 31.4°N, 110.3°E, 2800 m | Sino-American Botanical exp. 945 | E00181913 | 1 | - | 1c | 1 | - |
| *-* | E20 | Sichuan Prov, Nanchuan Co, China, 29.1°N, 107°E, 750 m | Liu, Zheng-yu 15368 | E00088293 | 1 | - | 1 d | 1 | 1 |
| *-* | E21 | Darboljen, Borhat, Hovsgol Park, Mongolia, 50.7894°N, 99.7458°E*, 2342 m | L.R. Caddick 154 | E00189697 | 1 | - | 1 b | 1 | 1 |
| *-* | E22 | Dzumaly River - Red Peak, Altai, Russia, 49.7544°N, 88.4285°E*, 2354 m | Western Altai exp. 28 | E00665626 | 1 | - | 1 b | 1 | 1 |
| *-* | E23 | Kunduyak river, Gorno-Altaysk, Altai Republic, Russia, 49.9908°N, 89.2364°E*, 2461 m | Edinburgh exp. Altai 34 | E00656070 | 1 | 1 | - | 1 | - |
| *-* | LZ1 | Unterlunkhofen, oberhalb Bergbauer, Aargau, Switzerland, 47.317°N, 8.377°E, 380 m | A. Kästner | LZ220264 | - | - | 1 a | 1 | 1 |
| *-* | LZ3 | Fluß Tschuja, Altai Republic, Russia, 50.13°N, 88.33°E*, 2000 m | C. Geyer 91 | LZ165718 | 1 | - | 1 b | 1 | 1 |
| *-* | LZ4 | Leuna, Sachsen-Anhalt, Germany, 51.30°N, 11.99°E, 110 m | P. Gutte 53/2008 | LZ203186 | 1 | - | 1 a | 1 | 1 |
| *-* | LZ7 | Gelände der Agra, Leipzig, Sachsen-Anhalt, Germany, 51.28°N, 12.37°E, 120 m | P. Gutte 135/06 | LZ201020 | 1 | - | 1 a | 1 | 1 |
| *-* | LZ8 | Schkeuditz, nur Dölzig, Sachsen-Anhalt, Germany, 51.37°N, 12.22°E, 100 m | P. Gutte 342/03 | LZ168480 | - | - | 1 a | 1 | 1 |
| *-* | STR1771 | Water supply channel, Hipsheim, Alsace, France, 48.46°N, 7.69°E, 144 m | E. Kapp | STR | - | - | 1 a | 1 | - |
| *-* | STRB3 | Wood hills of St Christau road, Midi-Pyrenees, France, 43.131°N, -0.594°E, 300 m | J. Jallu 8339 | STR | - | - | 1 a | 1 | - |
| *-* | TF02 | 710 Logging Trail, Hoping, Taichung, Taiwan, 24.36°N, 121.35°E, 2150 m | Shu-Chuan Liu 2085 | TF245295 | 1 | - | 1 c | 1 | 1 |
| *-* | TF03 | Mt. Tapachien, Miaoli, Taiwan, 24.46°N, 121.25°E, 3200 m | Z.W. Lee, C.C. Chen 702 | TF245424 | 1 | - | 1 c | 1 | - |
| *-* | TF05 | Wukuang, Shimen, Jiangxi, Wuning, China, 28.94°N, 114.95°E, 1500 m | C.M. Tan, F.B. Yi, J.S. Xiong 5564 | TF261708 | 1 | - | 1 d | 1 | - |
| *-* | TF06 | Wukuang, Shimen, Jiangxi, Wuning, China, 28.94°N, 114.95°E, 1500 m | C.M. Tan, F.B. Yi, J.S. Xiong 5564 | TF261709 | 1 | - | - | 1 | - |
| *-* | TF07 | Datian County, Fujian, China, 25.69°N, 117.85°E, 400 m | Herbal Community DT348 | TF278699 | - | - | 1 d | 1 | 1 |
| *-* | TF11 | Mt. Quanbao, Luoning, Henan, China, 34.16°N, 111.41°E, 1200 m | Miao Liu et al. H30037 | TF329999 | 1 | - | 1 c | 1 | 1 |
| *-* | TF12 | Mt. Laoyacha, Lingbao, Henan, China, 34.50°N, 110.80°E, 1200 m | Miao Liu et al. H10008 | TF332185 | - | - | 1 c | 1 | - |
| *-* | TF13 | Mt. Laojun, Luanchuan, Henan, China, 33.75°N, 111.63°E, 1200 m | Miao Liu et al. H40010 | TF332310 | 1 | - | 1 c | 1 | 1 |
| *-* | TF14 | Guangfeng County, Jiangxi, China, 28.43°N, 118.19°E, 100 m | Herbal Community GF189 | TF332616 | - | - | - | 1 | - |
| *-* | TF15 | Guangfeng County, Jiangxi, China, 28.43°N, 118.19°E, 100 m | Herbal Community GF190 | TF332617 | - | - | - | 1 | - |
| *-* | TF16 | Taikang, Hsinchu, Taiwan, 24.57°N, 121.34°E, 1400 m | Pi-Fong Lu 19550 | TF336299 | 1 | 6 | 1 d | 1 | 1 |
| *-* | TF18 | Shenmu Alley, Hsinchu, Taiwan, 24.5°N, 121.4°E, 2000 m | Pi-Fong Lu 19039 | TF337487 | 1 | - | 1 d | 1 | 1 |
| *-* | TF27 | Tayuling, Hualien, Taiwan, 24.25°N, 121.26°E, 2528 m | Chien-Fan Chen 3597 | TF390929 | 1 | - | 1 c | 1 | 1 |
| *-* | TF30 | Taikang, Hsinchu, Taiwan, 24.57°N, 121.34°E, 1400 m | Pi-Fong Lu 25955 | TF435005 | 1 | - | - | 1 | - |
| *-* | WU07 | Karlštejn, Beroun, Czech, 49.94°N, 14.19°E | J. Ruda | WU041941 | 1 | - | - | - | - |
| *-* | WU12 | Unterwolbling, Niederosterreich, Austria, 48.327°N, 15.604°E, 360 m | W. Till | WU026614 | 1 | - | 1a | 1 | 1 |
| *-* | WU13 | Traiskirchen, Thermenlinie, Niederosterreich, Austria, 48.0267°N, 16.2822°E*, 202 m | W. Till | WU061798 | 1 | - | 1 a | 1 | 1 |
| *-* | WU14 | Bezirk Spittal an der Drau, Kärnten, Austria, 46.9533°N, 13.0258°E*, 1860 m | C. Gilli & A. Berger | WU067174 | 1 | - | 1 a | 1 | 1 |
| *-* | WU15 | Hipfelhütte, Koralpe, Kärnten, Austria, 46.8081°N, 14.9458°E*, 1627 m | W. Till | WU071872 | - | - | 1 a | 1 | 1 |
| *-* | Eifel | Eifel, Nordrhein-Westfalen, Germany, 50.5414°N, 6.5888°E, 460 m | Bonn BG, Möseler & Lobin 2004 | STR | - | 1 | 1 a | 1 | 1 |
| *-* | F06-198 | Petite Camargue Alacienne, Alsace, France, 47.63°N, 7.54°E | CBN Mulhouse | STR | - | 1 | - | 1 | - |
| *-* | F99-126 | Uffholtz, Alsace, France, 47.82°N, 7.18°E | CBN Mulhouse | STR | - | 2 | - | 2 | - |
| *-* | Kref | Allgäu, Bayern, Germany, 47.75°N, 10.17°E | Krefeld BG, 65 | STR | - | 6 | 1 a | 1 | 1 |
| *superbus* | 11B | Meadow, La Wantzenau, Alsace, France, 48.663324°N, 7.812338°E*, 128 m | Hardion | STR75005 | 1 | 1 | 1 a | 3 | - |
| *superbus* | 11D | Meadow, Kilstett, Alsace, France, 48.677675°N, 7.842808°E*, 130 m | Hardion | STR75016 | - | - | - | 3 | - |
| *superbus* | 11G | Meadow, Gries, Alsace, France, 48.745302°N, 7.841222°E*, 128 m | Hardion | STR75034 | 1 | 4 | - | - | - |
| *superbus* | 11H | Meadow, Schirrhein, Alsace, France, 48.795871°N, 7.911004°E*, 116 m | Hardion | STR75036 | 1 | 2 | - | 3 | - |
| *superbus* | 14B | Meadow, La Wantzenau, Alsace, France, 48.672711°N, 7.872425°E*, 130 m | Hardion | STR75050 | - | - | 1 a | 3 | 1 |
| *superbus* | 14C | Meadow, Gambsheim, Alsace, France, 48.70127°N, 7.893524°E*, 128 m | Hardion | STR75058 | 1 | 1 | - | - | - |
| *superbus* | 18B | Meadow, Sundhouse, Alsace, France, 48.27028°N, 7.633451°E*, 161 m | Hardion | STR75087 | 3 | - | - | 3 | 1 |
| *superbus* | 20A | Meadow, Innenheim, Alsace, France, 48.489457°N, 7.586842°E*, 150 m | Hardion | STR75092 | 2 | - | 1 a | 3 | 1 |
| *superbus* | 20D | Meadow, Ohnenheim, Alsace, France, 48.203863°N, 7.486306°E*, 170 m | Hardion | STR75107 | 3 | 3 | - | 3 | - |
| *superbus* | 20C | Meadow, Huttenheim, Alsace, France, 48.344185°N, 7.595007°E*, 156 m | Hardion | STR75102 | 2 | - | - | - | - |
| *superbus* | 9A | Meadow, Oberhoffen/Moder, Alsace, France, 48.774679°N, 7.898495°E*, 123 m | Hardion | STR75112 | 3 | - | - | - | - |
| *superbus* | 9B | Meadow, Herrlisheim, Alsace, France, 48.740309°N, 7.902889°E*, 130 m | Hardion | STR75117 | 3 | - | - | - | - |
| *superbus* | 9C | Meadow, Bischwiller, Alsace, France, 48.734043°N, 7.86076°E*, 125 m | Hardion | STR75122 | 3 | - | - | - | - |
| *superbus* | 9D | Meadow, Gries, Alsace, France, 48.732828°N, 7.849031°E*, 123 m | Hardion | STR75127 | 2 | 2 | - | 3 | - |
| *superbus* | BRNU07 | Cesky Krumlov, Boletice, Loutka, S Bohemia, Czech, 48.8330°N, 14.1055°E*, 810 m | V. Grulich VG09/1616 | BRNU607502 | 1 | - | 1 a | 1 | 1 |
| *superbus* | BRNU08 | Cesky Krumlov, Boletice, Dolany, S Bohemia, Czech, 48.8293°N, 14.2150°E*, 570 m | V. Grulich, A. Vydrová VG09/955 | BRNU607708 | 1 | - | 1 a | 1 | 1 |
| *superbus* | BRNU09 | Blansko, Malá Haná, Vážany, S Moravia, Czech, 46.61°N, 16.68°E, 400 m | P. Hrouz | BRNU610379 | 1 | - | - | 1 | - |
| *superbus* | BRNU11 | Bilé Karpaty, Hodonin, Czech, 48.8675°N, 17.5159°E*, 360 m | K. Fajmon 1220 | BRNU592501 | 1 | - | 1 a | 1 | 1 |
| *superbus* | BRNU12 | Cesky Krumlov, Boletice, Vítěšovice, Bohemia, Czech, 48.8398°N, 14.1500°E*, 860 m | V. Grulich VG09/866 | BRNU607188 | 1 | - | 1 a | 1 | 1 |
| *superbus* | BRNU13 | České Budějovice, Kamenný Újezd, Bohemia, Czech, 48.9063°N, 14.4434°E*, 450 m | V. Grulich VG09/1196 | BRNU607644 | 1 | - | 1 a | 1 | 1 |
| *superbus* | BRNU14 | Cesky Krumlov, Boletice, Sádlno, Bohemia, Czech, 48.8992°N, 14.1139°E*, 750 m | V. Grulich VG09/1061 | BRNU607611 | 1 | - | 1 a | 1 | 1 |
| *superbus* | BRNU16 | Kromēriz, Jankovice, Moravia, Czech, 49.3500°N, 17.6279°E*, 310 m | Z. Otýpková | BRNU609431 | 1 | - | 1 a | 1 | 1 |
| *superbus* | CBNFC1 | Porfondrez, Bannans, Franche-Comte, France, 46.90°N, 6.25°E, 820 m | CBN Franche-Comté | STR | - | 7 | 1 a | 1 | 1 |
| *superbus* | E11 | Sideroneri - Skaloti, Eparchia, Macedonia, Greece, 41.3833°N, 24.2833°E*, 880 m | K. Tan 8691 | E00228620 | 1 | - | 1 a | 1 | 1 |
| *superbus* | Gab1 | Nyírábrány, Káposztás lapos, Hajdú-Bihar, Hungary, 47.54°N, 22.01°E | Papp László | - | - | - | 1 a | 1 | 1 |
| *superbus* | Gab2 | Nyírábrány, Káposztás lapos, Hajdú-Bihar, Hungary, 47.54°N, 22.01°E | Papp László | - | - | - | - | 1 | - |
| *superbus* | Gab3 | Budapest, Soroksári BG, Central Hungary, Hungary, 47.40°N, 19.15°E | - | - | - | - | 1 a | 1 | 1 |
| *superbus* | Gab4 | Budapest, Soroksári BG, Central Hungary, Hungary, 47.40°N, 19.15°E | - | - | - | - | - | 1 | - |
| *superbus* | Gab7 | Vámospércs, Jónás-rész, Hajdú-Bihar, Hungary, 47.55°N, 21.96°E | Papp László | - | - | - | 1 a | 1 | 1 |
| *superbus* | LZ5 | Osterwald, Zingst, Mecklenburg-Vorpommern, Germany, 54.44°N, 12.70°E, 3 m | U. Amarell Z 978 | LZ165822 | 1 | - | 1 a | 1 | 1 |
| *superbus* | LZ6 | Zingst, Mecklenburg-Vorpommern, Germany, 54.43°N, 12.91°E, 1 m | U. Amarell Z 957 | LZ165821 | 1 | - | 1 a | 1 | - |
| *superbus* | STRB4 | Meadow, Lake Bellefontaine, Jura, France, 46.585°N, 6.1°E, 1120 m | R. Engel | STR | - | - | 1 a | 1 | - |
| *superbus* | NS01-087 | Narces de Chaudeyrolles, Auvergne, France, 44.945°N, 4.195°E | CBN Auvergne | STR | - | 2 | - | 1 | 1 |
| *superbus* | NS97-005 | Narces de Chaudeyrolles, Auvergne, France, 44.945°N, 4.195°E | CBN Auvergne | - | - | - | 1 a | 1 | 1 |
| *superbus* | NS98-017 | Narces de Chaudeyrolles, Auvergne, France, 44.945°N, 4.195°E | CBN Auvergne | - | - | - | - | 1 | 1 |
| *superbus* | Sab | Meadow, Grafenstein, Sabuatach, Carinthia, Austria, 48.5893°N, 14.4677°E*, 570 m | Schlatti, AT-1-KL2014/3364 | STR | - | 8 | 1 a | 2 | 1 |
| *sylvestris* | 98.9034 | Ferhauchier, Sercoeur, Lorraine, France, 48.27°N, 6.53°E | CB Lorraine | 98.9034 | - | - | - | - | - |
| *sylvestris* | 20B | Forest roadside, Ottrott, Alsace, France, 48.468322°N, 7.403223°E*, 333 m | Hardion | STR75097 | 3 | - | 1 a | 3 | 1 |
| *sylvestris* | CBNFC2 | La Cote, Athose, Franche-Comte, France, 47.082°N, 6.331°E, 770 m | CBN Franche-Comté | STR | - | 2 | 1 a | 1 | 1 |
| *sylvestris* | STR10696 | Eguisheim vers Husseren, Alsace, France, 48.036°N, 7.269°E, 510 m | R. Engel | STR10696 | 1 | - | - | 1 | - |
| *sylvestris* | STR1770 | Obere Bers, Vosges Meridionales, Lorraine, France, 47.85°N, 6.91°E, 1080 m | O. Kaff | STR1770 | 1 | - | 1 a | 1 | - |
| *sylvestris* | STRB2 | - | - | STR | 1 | - | - | - | - |
| *sylvestris* | NS01-148 | Roadside near Rilhac, Pignols, Auvergne, France, 45.658°N, 3.288°E | CBN Auvergne | STR | 1 | - | 1 a | 1 | 1 |
| *sylvestris* | NS01-149 | Side of wood, Sauxilanges, Auvergne, France, 45.55°N, 3.38°E | CBN Auvergne | STR | - | 1 | - | 1 | 1 |
| *sylvestris* | NS01-169 | Wood of Cantelouve, Narnhac, Auvergne, France, 44.913°N, 2.777°E | CBN Auvergne | - | - | - | - | 1 | 1 |
| *sylvestris* | NS02-072 | Trémouille, Effiat, Auvergne, France, 46.07°N, 3.31°E | CBN Auvergne | - | - | - | 1 a | 1 | 1 |
| *sylvestris* | NS02-074 | Lezat Forests, D91E2, Bas et Lezat, Auvergne, France, 46.042°N, 3.324°E | CBN Auvergne | - | - | - | - | 1 | - |
| *sylvestris* | NS03-064 | Prentegarde, Roffiac, Auvergne, France, 45.054°N, 3.021°E | CBN Auvergne | - | - | - | 1 a | 1 | 1 |
| *alpestris* | Dolo | South Tyrol, Italy, 46.36°N, 11.59°E | M. Tremolières | STR | 1 | - | 1 a | 1 | 1 |
| *alpestris* | E12 | Mt Yubari, Gamaiwa, Hokkaido, Japan, 43.05°N, 141.97°E, 400 m | Brooks, R.R. 89-31 | E00295778 | 1 | - | - | 1 | - |
| *alpestris* | Gab5 | Munţii Rodnei, Muntele Calul, E Carpathians, Romania, 47.54°N, 24.69°E | - | - | - | - | 1 a | 1 | 1 |
| *alpestris* | Gab6 | Munţii Ciucaş, Cabana Mt. Rosu, E Carpathians, Romania, 45.51°N, 25.92°E | - | STR | 1 | - | 1 a | 1 | 1 |
| *alpestris* | LZ2 | Koralpe, Kärnten, Austria, 46.79°N, 14.95°E, 1700 m | P. Gutte 366/99 | LZ161337 | 1 | - | 1 a | 1 | 1 |
| *alpestris* | STR10734 | Piz Danis, Switzerland, 46.74°N, 9.51°E, 2400 m | Lenzerheide | STR | - | - | - | 1 | - |
| *alpestris* | STRB1 | Eastern Alps | Triglar | STR | 1 | - | - | - | - |
| *alpestris* | STRB5 | Keldenich, Nordrhein-Westfalen, Eifel, Germany, 50.82°N, 6.96°E, 50 m | P. Auquier, J. Lambinon | STR | - | - | 1 a | 1 | - |
| *alpestris* | STRHG1 | Coppet, Vaud, Switzerland, 46.32°N, 6.19°E, 390 m | Kiener | STR | 1 | - | - | - | - |
| *alpestris* | STRHG3 | Seiser Alpe, Baren, Italy, 46.54°N, 11.65°E, 1860 m | E.R. Missbach | STR | 1 | - | - | - | - |
| *alpestris* | WU09 | 1km NNE vom Gaberl, Stubalpe, Steiermark, Austria, 47.11°N, 14.92°E, 1450 m | W. Till | WU | 1 | - | 1 a | 1 | 1 |
| *alpestris* | WU10 | Koralpe, Oesterreich, Steiermark, Austria, 46.825°N, 14.994°E*, 1900 m | F. Tod, R. Wernet | WU022344 | 1 | - | 1 a | 1 | 1 |
| *alpestris* | WU11 | 1.3km N von Tweng, Salzburg, Austria, 47.2017°N, 13.6025°E*, 1915 m | C. Pachschwoell | WU064538 | 1 | - | 1 a | 1 | 1 |
| *alpestris* | Graz | Wölzer Tauern, Gruber-Himkogel, Styria, Austria, 47.334°N, 14.305°E*, 2030 m | Graz BG, AT-0-GZU-10246 | STR | - | 5 | 1 a | 1 | 1 |
| *alpestris* | Stei | Barentalalm, Koralpe, Steiermark, Austria, 46.8066°N, 14.8172°E*, 1830 m | Graz BG, AT-0-BR-2008100969 | STR | - | 5 | 1 a | 1 | 1 |
| *longicalycinus* | E09 | Sarobetsu moor, Hokkaido, Japan, 45.1°N, 141.7°E, 5 m | AGS exp. Japan 1988/207 | E00294603 | 1 | - | - | 1 | - |
| *longicalycinus* | E13 | Mt Kuromoriyama, Amori, Kuroishi, Honshu, Japan, 40.6379°N, 140.6918°E*, 540 m | Edinburgh Japan exp. 2003/153 | E00189780 | 1 | - | - | 1 | 1 |
| *longicalycinus* | E14 | Nakahira, Middle stream of Abe river, Shizuoka, Japan, 35.17°N, 138.36°E, 200 m | Konta, Fumihiro 18322 | E00223065 | 1 | - | - | 1 | 1 |
| *longicalycinus* | E16 | Wufeng Hsiang, Sheipa Park, Hsinchu Hsien, Taiwan, 24.5033°N, 121.1139°E*, 2000 m | C.L. Huang, W.H. Hu, Y.Y. Lien 128 | E00181942 | 1 | - | 1 d | 1 | 1 |
| *longicalycinus* | TF01 | TongPu to Lele Shelter, Nantou, Taiwan, 23.57°N, 120.92°E, 1300 m | Pi-Fong Lu 8032 | TF210226 | 1 | - | 1 d | 1 | - |
| *longicalycinus* | TF04 | North Cross Higiway, Ilan, Taiwan, 24.61°N, 121.49°E, 900 m | Pi-Fong Lu 10722 | TF250080 | 1 | - | 1 d | 1 | - |
| *longicalycinus* | TF08 | Paling, Taoyuan, Taiwan, 24.68°N, 121.39°E, 800 m | Yu-Pin Cheng 4526 | TF281464 | 1 | - | - | 1 | - |
| *longicalycinus* | TF09 | Paling, Taoyuan, Taiwan, 24.68°N, 121.39°E, 800 m | Yu-Pin Cheng 4528 | TF281462 | - | - | - | 1 | - |
| *longicalycinus* | TF10 | Sankuang, Taoyuan, Taiwan, 24.67°N, 121.37°E, 700 m | Yu-Pin Cheng 6257 | TF287997 | 1 | - | 1 d | 1 | - |
| *longicalycinus* | TF17 | Taikang, Hsinchu, Taiwan, 24.57°N, 121.34°E, 1450 m | Shih-Wen Chung 9815 | TF336636 | 1 | - | 1 d | 1 | - |
| *longicalycinus* | TF19 | Taikang, Hsinchu, Taiwan, 24.57°N, 121.34°E, 1200 m | Shih-Wen Chung 10097 | TF345828 | 1 | - | 1 d | 1 | - |
| *longicalycinus* | TF20 | Taikang, Hsinchu, Taiwan, 24.57°N, 121.34°E, 1200 m | Shih-Wen Chung 10095 | TF345829 | 1 | - | - | 1 | - |
| *longicalycinus* | TF21 | Taikang, Hsinchu, Taiwan, 24.57°N, 121.34°E, 1200 m | Shih-Wen Chung 10094 | TF345832 | - | - | - | 1 | - |
| *longicalycinus* | TF22 | Mt. Chiali, Miaoli, Taiwan, 24.51°N, 121.01°E, 2100 m | Tian-Chuan Hsu 3053 | TF367677 | 1 | - | 1 d | 1 | 1 |
| *longicalycinus* | TF23 | Ssumakussu Productive Road, Hsinchu, Taiwan, 24.58°N, 121.34°E, 1500 m | Pi-Fong Lu 22744 | TF369874 | 1 | - | 1 d | 1 | 1 |
| *longicalycinus* | TF24 | Ssumakussu Productive Road, Hsinchu, Taiwan, 24.58°N, 121.34°E, 1500 m | Pi-Fong Lu 22745 | TF369875 | - | - | - | 1 | - |
| *longicalycinus* | TF25 | Ssumakussu Productive Road, Hsinchu, Taiwan, 24.58°N, 121.34°E, 1500 m | Pi-Fong Lu 22744 | TF369939 | - | - | - | 1 | - |
| *longicalycinus* | TF26 | Ssumakussu Productive Road, Hsinchu, Taiwan, 24.58°N, 121.34°E, 1500 m | Pi-Fong Lu 22745 | TF369940 | - | - | - | 1 | - |
| *longicalycinus* | TF28 | Central Cross Highway, Hualien, Taiwan, 24.20°N, 121.43°E | Chien-Fan Chen 3313 | TF408406 | 1 | - | 1 c | 1 | 1 |
| *longicalycinus* | TF29 | Paling, Taoyuan, Taiwan, 24.68°N, 121.39°E, 600 m | Che-Wei Lin 486 | TF422613 | 1 | - | 1 d | 1 | 1 |
| *longicalycinus* | YA2 | Fujiyoshida-shi, Yamanashi, Japan, 35.5°N, 138.8°E | Tokyo Metro. Med. BG, 33/YA2 | STR | - | - | 1 c | 1 | 1 |
| *D. palinensis* | DpalTF1 | Fuhsing Township, Taoyuan, Taiwan, 24.82°N, 121.35°E, 1200 m | Pi-Fong Lu 16826 | TF304328 | 1 | - | 1 d | 1 | 1 |
| *D. palinensis* | DpalTF2 | Chupei, Hsinchu, Taiwan, 24.83°N, 121.00°E, 20 m | Che-Wei Lin 119 | TF311174 | 1 | - | - | 1 | 1 |
| *D. palinensis* | DpalTF3 | Chupei, Hsinchu, Taiwan, 24.83°N, 121.00°E, 20 m | Che-Wei Lin 119 | TF311176 | 1 | - | 1 d | 1 | - |
| *D. pygmaeus* | DpygE10 | Ho-Huan Shan, Nantou, Taiwan, 24.1692°N, 121.2928°E*, 2820 m | Edinburgh Taiwan exp. 266 | E00294601 | 1 | - | - | 1 | - |
| *D. pygmaeus* | DpygTF1 | Chungchihkuan Alley, Kaohsiung, Taiwan, 23.28°N, 120.91°E, 2300 m | Pi-Fong Lu 16439 | TF297002 | 1 | - | 1 d | 1 | - |
| *D. pygmaeus* | DpygTF2 | Mt. Tao, Taichung, Taiwan, 24.43°N, 121.30°E, 3100 m | Zhi-Hao Chen 971 | TF298455 | 1 | - | - | 1 | - |
| *D. pygmaeus* | DpygTF3 | Kuankao to Tuikuan, Nantou, Taiwan, 23.52°N, 120.97°E, 2350 m | Tian-Chuan Hsu 5202 | TF387760 | 1 | - | - | 1 | 1 |
| *D. pygmaeus* | DpygTF4 | Chengkung Shelter to Chilai Shelter, Taiwan, 24.08°N, 121.26°E, 3100 m | Tian-Chuan Hsu 3266 | TF392375 | 1 | - | - | 1 | 1 |
| *D. pygmaeus* | DpygTF5 | Sanliuchiu Shelter to Mt. Hsueh Entrance, Taichung, Taiwan, 24.36°N, 121.22°E, 2800 m | Pi-Fong Lu 24163 | TF400568 | 1 | - | - | 1 | 1 |

GenBank accessions: a, MT230553; b, MT247084; c, MT247085; d, MT247086

**Table S2.** Variable sites of the internal transcribed spacers (ITS) among the four ribotypes of *Dianthus superbus*. The 'E Asia x' haplotype was estimated as the complement of 'E Asia 1' haplotype to obtain 'E Asia 2' haplotype considering ambiguous nucleotides, but this haplotype was not found in the study sampling. Site positions were estimated after trimming of PCR primers.

| **Ribo-types** | **ITS variable sites** | | | | | | | | | | | | | | | | | |
| --- | --- | --- | --- | --- | --- | --- | --- | --- | --- | --- | --- | --- | --- | --- | --- | --- | --- | --- |
| **60** | **77** | **82** | **84** | **91** | **115** | **116** | **148** | **153** | **223** | **391** | **448** | **467** | **483** | **491** | **534** | **597** | **629** |
| Europe | C | T | A | T | T | T | A | C | C | T | T | A | A | C | A | T | T | T |
| C Asia | C | A | A | T | T | C | A | C | T | T | C | A | A | C | T | T | T | T |
| E Asia 1 | C | A | A | T | T | Y | A | C | Y | T | Y | A | A | C | W | T | T | W |
| E Asia 2 | Y | A | W | Y | Y | Y | W | Y | Y | Y | Y | R | R | Y | W | W | Y | W |
| E Asia x | T | A | T | C | C | Y | T | T | Y | C | Y | G | G | T | W | A | C | A |

Ambiguities follow the IUPAC code: Y = C or T; W = A or T; R = A or G

**Table S3.** Summary of chromosome counts from literature for *Dianthus superbus s.l.*

| ***2n*** | **Europe** | **Centre Asia** | **Eastern Asia** |
| --- | --- | --- | --- |
| *2n* = 30 | Francea, Germanyb, Norwayc, Swedend,e, Polandf,g, Austriah,i, Czechj, Slovakiak,l,m, Yougoslavian, Bulgariao, Belarusp | Russiaq,r, C Siberias, Baikalt,  E Sayanu | SE Russia1, China2, NE China3, Korea4, Japan5,6,7 |
| *2n* = 60 | - | E Sayanv | - |
| *2n* = 90 | - | Russiaw, Turkestanx (as *D. hoeltzeri*) | - |

a Bernard 1971, b Andersson-Kottö & Gairdner 1931, c Laane 1966, d Lövkvist & Hultgård 1999, e Turesson 1938, f Pogan *et al.* 1986, g Joachimiak 1991, h Dobes & Hahn 1997, i Vitek *et al.* 1992, j Mĕsíček 1992, k Májovský *et al.* 1974, l Májovský *et al.* 1970, m Uhríková & Májovský 1978, n Carolin 1957, o Petrova & Stoyanova 1998, p Dmitrieva *et al.* 1977, q Zhukova 1967, r Rostovtseva 1981, s Malakhova 1990, t Belaeva & Siplivinsky 1976, u Malik *et al.* 2011, v Krogulevich 1978, w Puch 1941, x Ishii 1930, 1 Probatova 2006, 2 Zhang 1992, 3 Ge & Li 1989, 4 Lee 1967, 5 Nishikawa 1985, 6 Tani 1981, 7 Taylor 1967.

We deliberately discredited two counts at *2n* = 60 for putative hybrids from botanical gardens (unknown wild origin) bearing undescribed names (var. *albus*, Carolin 1956; unranked *nanus*, Andersson-Kottö & Gairdner 1931), and one count from SE Germany at *2n* = 20 (Lipper 2006), an outlier number for the genus *Dianthus* almost only represented by *2n* = 30, 60 and 90.

**Figure S1.** Neighbour joining phenetic tree of phylogenetic relationships with *Dianthus superbus* based on 328 AFLP markers and 468 SSR markers, using Jaccard binary distances. Only bootstrap values superior to 50% were displayed, based on 1 000 replicates. Orange squares indicate Centre Asian samples.

**
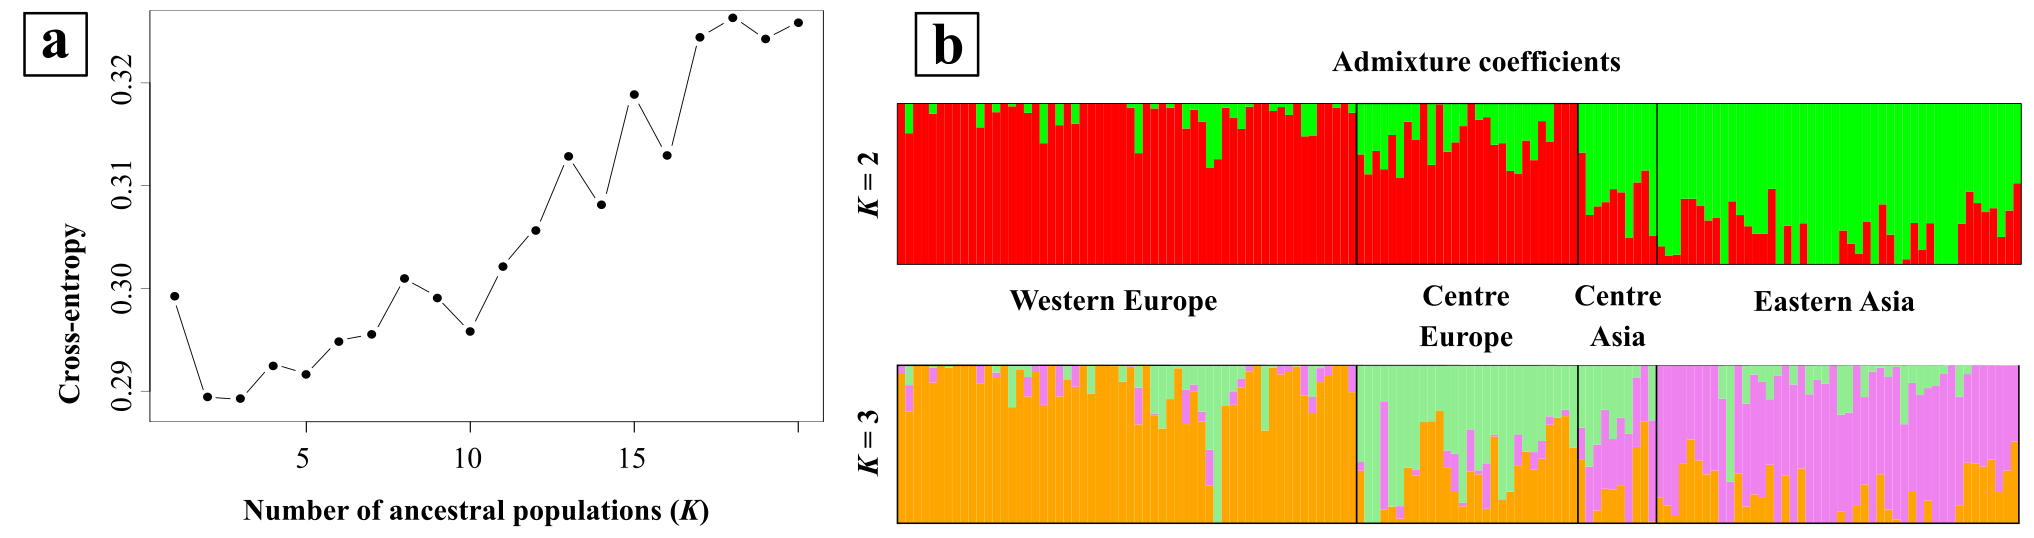
**

**Figure S2.** Species genetic structure and genotype admixture; (a) most suitable number of ancestral populations (*K*) based on the cross-entropy value; (b) ancestry coefficients for each genotype considering *K* = 2 and *K* = 3.

**Figure S3.** Boxplots of morphometric variables comparing taxa. Red crosses represent morphometric values from type material.


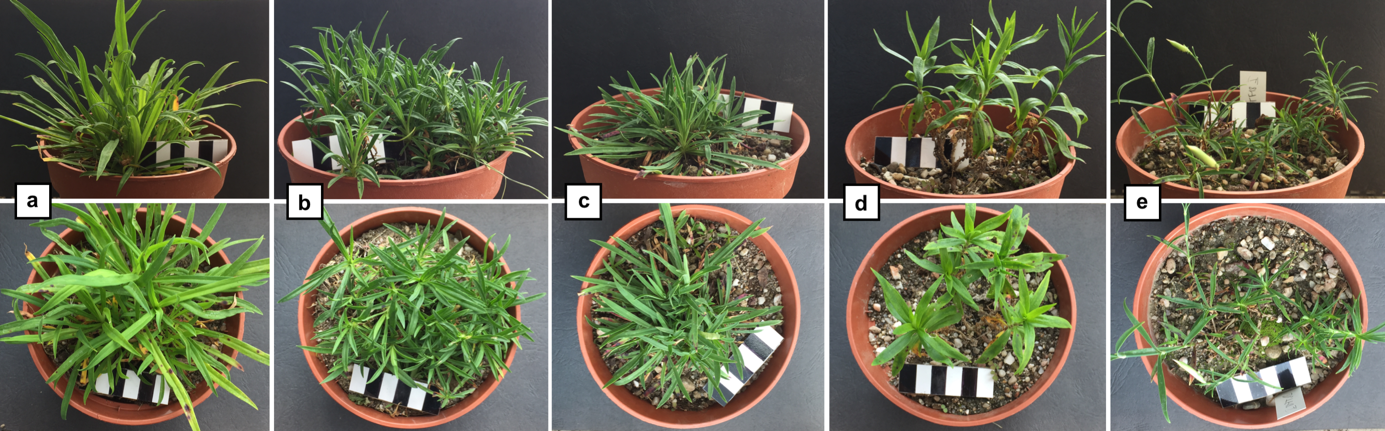


**Figure S4.** Differences in rosettes and leaves for localities of *Dianthus superbus s.l.* cultivated under uniform environmental conditions at the Botanical Garden of the University of Strasbourg. (a) *D. superbus* subsp. *superbus*, Gouaix, France (99-9044); (b) *D. superbus* subsp. *alpestris*, Barentalalm, Austria (Stei); (c) Centre Asian *D. superbus*, Gorno-Altaysk, Altai, Russia (E23); (d) East Asian *D. superbus*, Taikang, Taiwan (TF16); (e) East Asian *D. superbus*, Shenmu Alley, Taiwan (TF18).


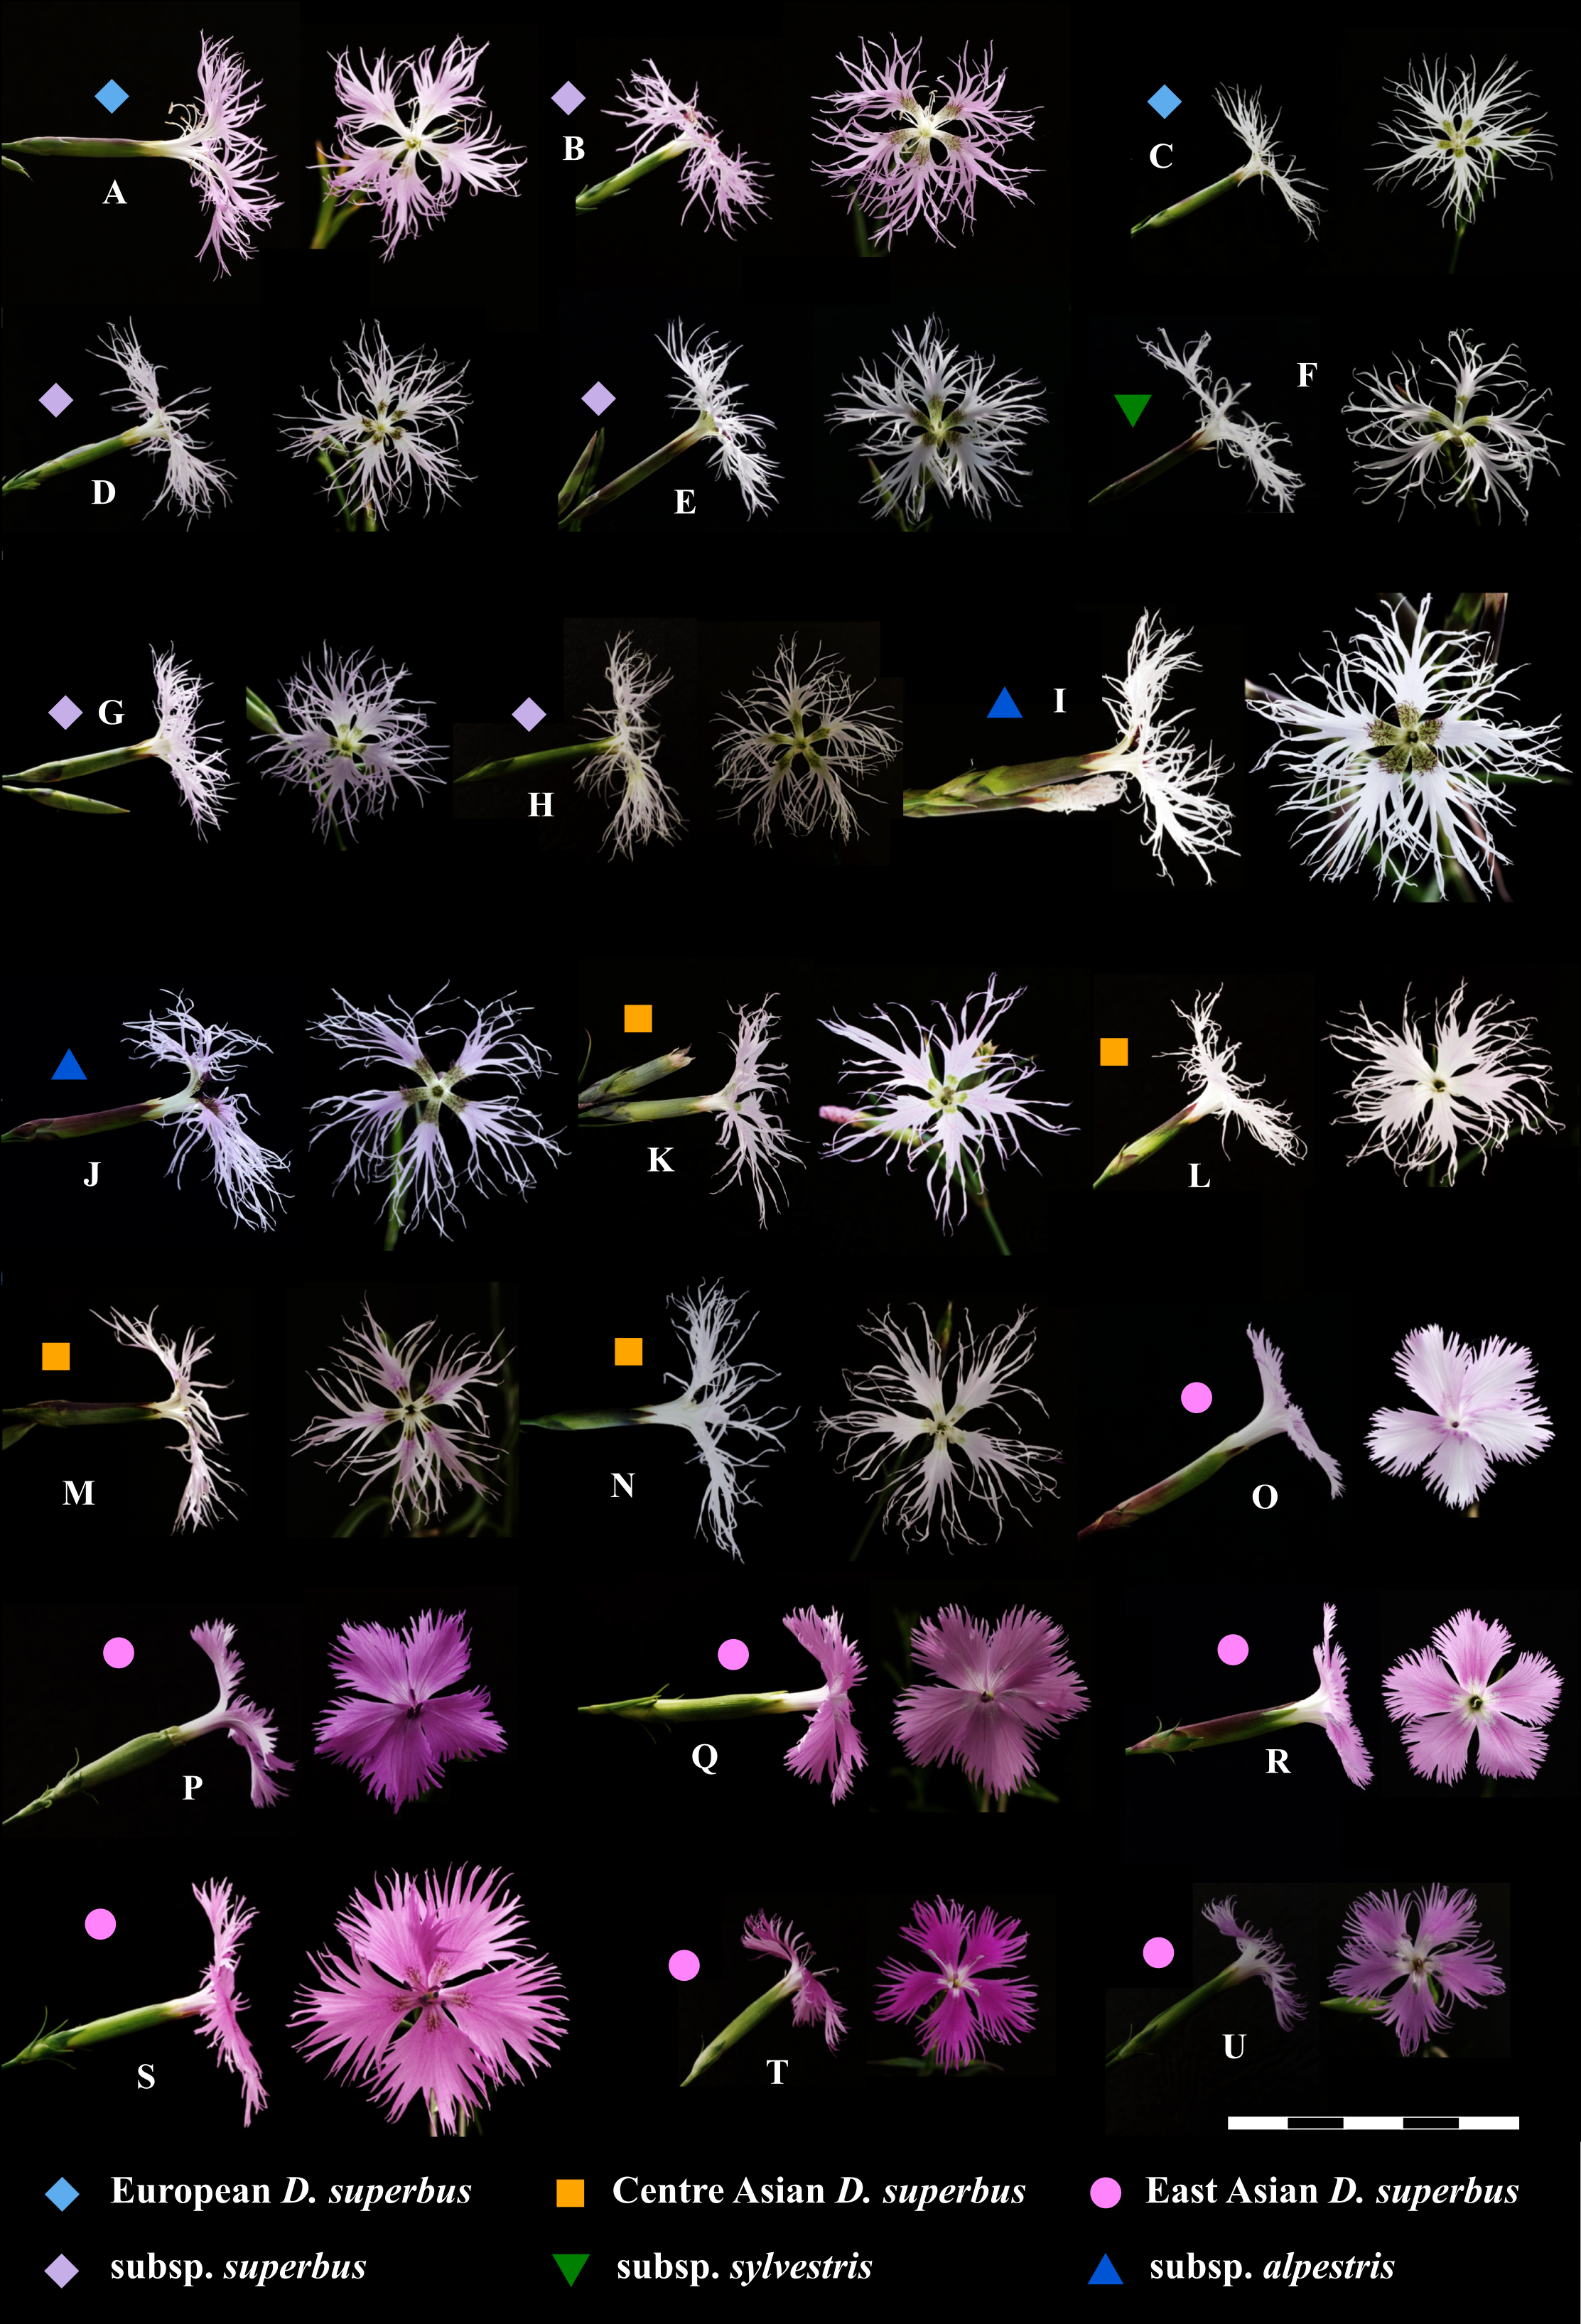


**Figure S5**. Flowers of *Dianthus superbus* from the following localities: A, Ganties, Midi-Pyrénées, France; B, La Wantzenau, Alsace, France; C, Allgäu, Bayern, Germany; D, E, Grafenstein, Sabuatach, Carinthia, Austria; F, La Cote, Athose, Franche-Comte, France; G, Narces de Chaudeyrolles, Auvergne, France; H, Porfondrez, Bannans, Franche-Comte, France; I, Barentalalm, Koralpe, Steiermark, Austria; J, Wölzer Tauern, Gruber-Himkogel, Styria, Austria; K, L, M, N, Kunduyak river, Gorno-Altaysk, Altai, Russia; O, P, Q, R, Taikang, Hsinchu, Taiwan; S, Fujiyoshida-shi, Yamanashi, Japan; T, U, Shenmu Alley, Hsinchu, Taiwan.


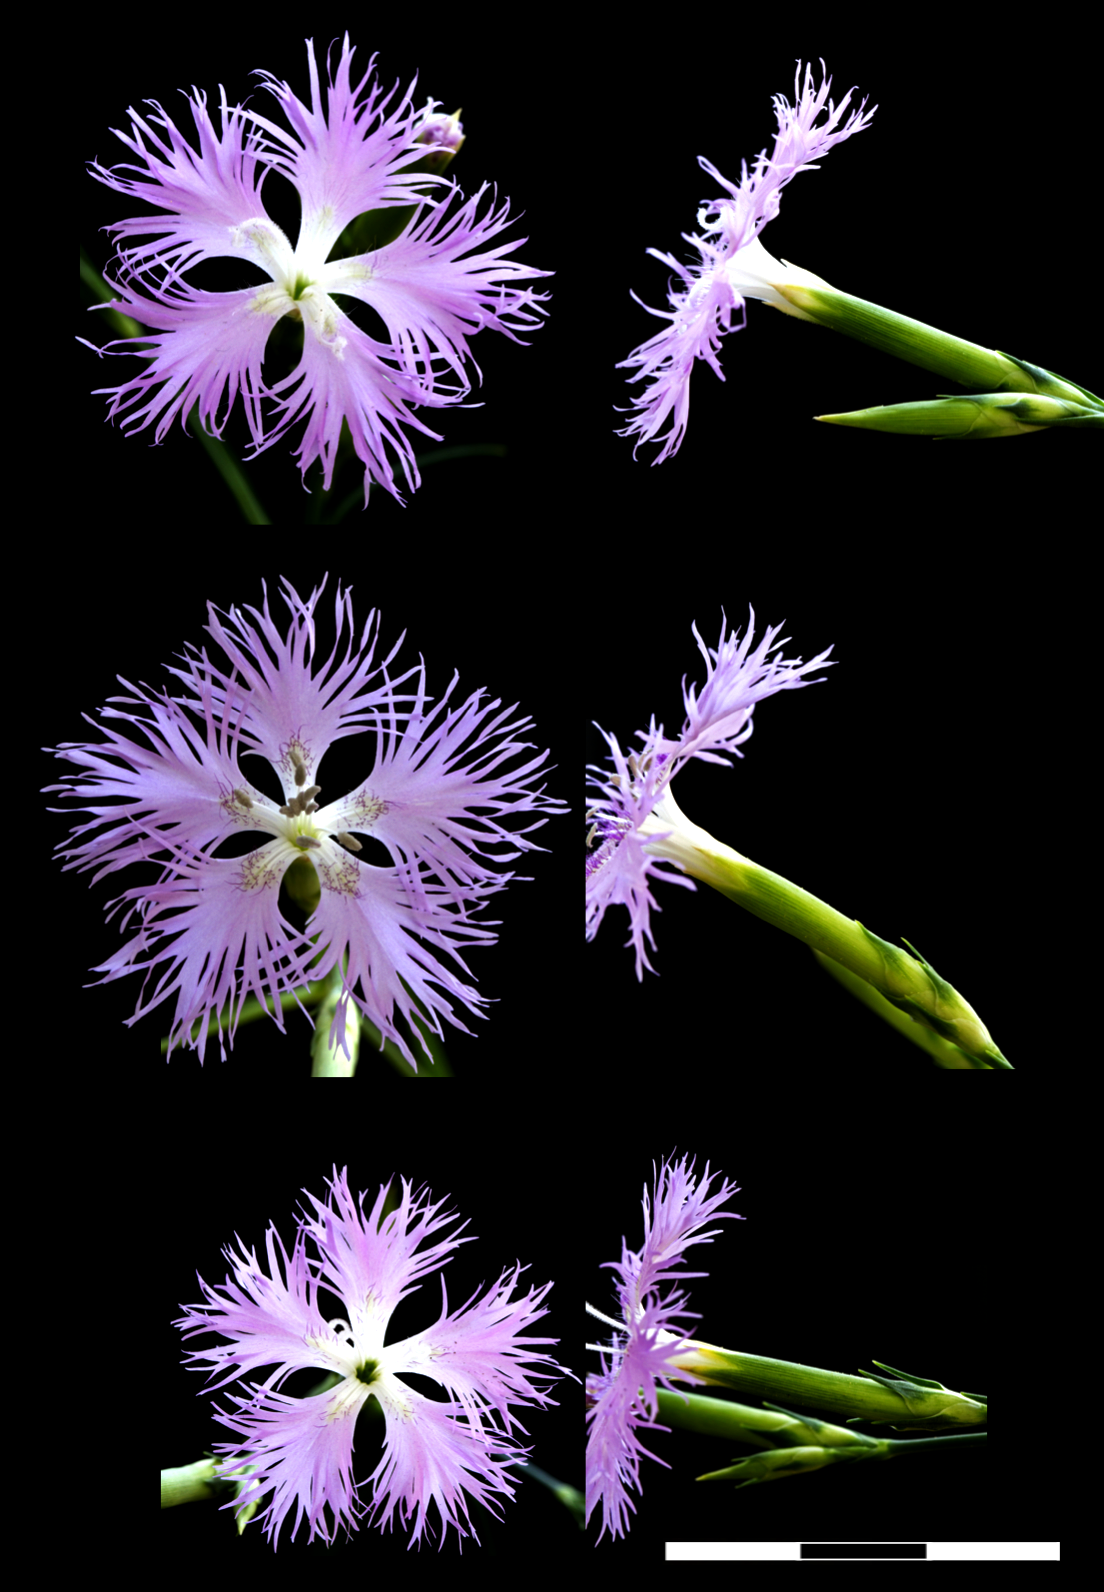


**Figure S6**. Flowers of hybrids generated in laboratory from cross-pollination between European (14G, Alsace, France) and Asian (TF18, Taiwan) samples of *Dianthus superbus*.
